# Supplementary material
Source: Elsevier journal article supplement (https://www.sciencedirect.com/science/article/pii/S2173505021000145)
Supplement: mmc3 [file S2173505021000145:mmc3.docx]

| **Instrument** | **Publication** | **Measurement** | **Items (N)** | **Type of instrument**  **(administration)** | **Domains** | **Reliability** | **Validity** |
| --- | --- | --- | --- | --- | --- | --- | --- |
| **PANSS** | Peralta and Cuesta (1994) | Schizophrenia symptoms | 30 | Semi-structured/ Clinician rated | 3 domains:  - Positive  - Negative  - General  - Composite | Internal reliability:  α= 0.73 for the positive scale  α= 0.83 for the negative scale  α= 0.87 for the general scale | Concurrent validity with BPRS, SAPS, SANS and CGI from 0.52 to 0.77 |
| **CDSS** | Sarró S. et al. (2004) | Severity of depression | 13 | Structured/Clinician rated | 1 domain:  -Severity of depression | Internal reliability α= 0.83  Inter-rater reliability: >0.73  Test–retest reliability of 0.89 | Concurrent validity with HDRS and BDI of 0.80 |
| **PSP** | García-Portilla MP et al. (2011) | Personal and social functioning | 5 | Semi-structured/Clinician rated | 4 domains:  - Socially useful activities, including work and study.  - Personal and [social relationships](https://www-sciencedirect-com.are.uab.cat/topics/medicine-and-dentistry/social-interaction).  - [Self-care](https://www-sciencedirect-com.are.uab.cat/topics/psychology/self-care).  -Disturbing and aggressive behaviors. | Internal reliability α=0.87  Test-retest reliability of 0.98 | Concurrent validity with the SOFAS scale was 0.94, and with CGI-G was -0.88. |
| **CAPE-42** | Fonseca E. et al. (2012) | Psychotic-like experiences | 42 | Structured/Self-reported | 3 domains:  - Positive.  - [Negative.](https://www-sciencedirect-com.are.uab.cat/topics/medicine-and-dentistry/negative-syndrome)  - Depressive. | Internal reliability:  from α=0.78 to α=0.89 in the sample of students  from α=0.84 to α= 0.93 in patients with psychosis | Correlation between CAPE-Positive and Peters Delusion Inventory was 0.77 |
| **CBQ** | Peters et al. (2013)  Lía Corral (2019) | Cognitive distortions in psychosis | 30 | Structured/Self-reported | 5 domains:  -Intentionalizing  - Catastrophizing  - Dichotomous thinking  - Jumping to conclusions  - Emotional reasoning | Internal reliability:  α= 0.89 (English version)  α= 0.87 (Spanish version)  Test-retest reliability of 0.96 | Construct validity:  CBQ correlated with the Cognitive Style Test (r= 0.85)  Concurrent validity: CBQ scores correlated modestly with PSYRATS (r= 0.36). |

Table S1. Psychometric description of the psychometric instruments (validated to Spanish)

Abbreviations: CBQ: Cognitive Biases Questionnaire for Psychosis; PANSS: Positive and Negative Syndrome Scale; CDSS: Calgary Depression Scale for Schizophrenia; PSP: Personal and Social Performance scale; CAPE-42: Community Assessment of Psychic Experiences; BPRS: Brief Psychiatric Rating Scale; SAPS: Scale for the Assessment of Positive Symptoms; SANS: Scale for the Assessment of Negative Symptoms; CGI: Clinical Global Impression; HDRS: Hamilton Depression Rating Scale; BDI: Beck Depression Inventory; SOFAS: The Social and Occupational Functioning Assessment Scale.

**REFERENCES**:

Peralta Martín V, Cuesta Zorita MJ. Validacion de la escala de los síndromes positivo y negativo (PANSS) en una muestra de esquizofrenicos españoles [Validation of positive and negative symptom scale (PANSS) in a sample of Spanish schizophrenic patients]. Actas Luso Esp Neurol Psiquiatr Cienc Afines. 1994;22(4):171-177.

Sarró S, Dueñas RM, Ramírez N, et al. Cross-cultural adaptation and validation of the Spanish version of the Calgary Depression Scale for Schizophrenia [published correction appears in Schizophr Res. 2994 Oct 1;70(2-3):345]. Schizophr Res. 2004;68(2-3):349-356. doi:10.1016/S0920-9964(02)00490-5Garcia-Portilla MP et al. (2011)

Garcia-Portilla MP, Saiz PA, Bousoño M, et al. Validation of the Spanish Personal and Social Performance scale (PSP) in outpatients with stable and unstable schizophrenia. Rev Psiquiatr Salud Ment. 2011;4(1):9-18. doi:10.1016/j.rpsm.2010.11.003

Fonseca-Pedrero E, Paino M, Lemos-Giráldez S, Muñiz J. Validation of the Community Assessment Psychic Experiences -42 (CAPE-42) in Spanish college students and patients with psychosis. Actas Esp Psiquiatr. 2012;40(4):169-176.Peters et al. (2013)

Peters ER, Moritz S, Schwannauer M, et al. Cognitive Biases Questionnaire for psychosis. Schizophr Bull. 2014;40(2):300-313. doi:10.1093/schbul/sbs199

Lía Corral. Validación del Cuestionario de Sesgos Cognitivos para la Psicosis (CBQp): Relación con sintomatología, insight y neurocognición. Tesis Doctoral. Universitat Rovira i Virgili. 2019.
