# Supplementary material
Source: Elsevier journal article supplement (https://www.sciencedirect.com/science/article/pii/S2173505021000145)
Supplement: mmc4 [file S2173505021000145:mmc4.docx]

Table S2. Associations among cognitive biases and psychopathology in healthy adolescents.

|  | CBQ-total | CBQ-I | CBQ-C | CBQ-DT | CBQ-JTC | CBQ-ER |
| --- | --- | --- | --- | --- | --- | --- |
| CAPE positive | 0.375* | 0.159 | 0.251 | 0.314* | 0.209 | 0.297* |
| CAPE negative | 0.018 | -0.168 | -0.026 | 0.249 | -0.026 | 0.037 |
| CAPE depressive | 0.339* | -0.007 | 0.210 | 0.468** | 0.139 | 0.268 |
| CAPE total | 0.346* | -0.030 | 0.227 | 0.382* | 0.165 | 0.398** |

Data are Spearman correlation coefficients (r). * P value<0.05; ** P value<0.01.

Abbreviations: CBQ= Cognitive Biases Questionnaire for Psychosis; CBQ-I=CBQ intentionalizing subscore; CBQ-C= CBQ catastrophizing subscore; CBQ-DT=CBQ dichotomous thinking subscore; CBQ-JTC=CBQ jumping to conclusions subscore; CBQ-ER=CBQ emotional reasoning subscore; CAPE= Community Assessment of Psychic Experiences.
