# Supplementary material
Source: Elsevier journal article supplement (https://www.sciencedirect.com/science/article/pii/S2173505021000145)
Supplement: mmc5 [file S2173505021000145:mmc5.docx]

Table S3. Associations among cognitive biases and psychopathology in clinical groups.

|  | ROP (N=43) | | | | | | SCZ (N=63) | | | | | |
| --- | --- | --- | --- | --- | --- | --- | --- | --- | --- | --- | --- | --- |
|  | **CBQ-Total** | **CBQ-I** | **CBQ-C** | **CBQ-DT** | **CBQ-JTC** | **CBQ-ER** | **CBQ-**  **Total** | **CBQ-I** | **CBQ-C** | **CBQ-DT** | **CBQ-JTC** | **CBQ-ER** |
| PANSS-POS | 0.200 | 0.210 | 0.244 | 0.347* | 0.038 | 0.162 | 0.309* | 0.082 | 0.286* | 0.273* | 0.392** | 0.209 |
| PANSS-NEG | -0.091 | 0.129 | -0.137 | -0.055 | -0.133 | -0.062 | 0.211 | 0.134 | 0.190 | 0.179 | 0.109 | 0.259* |
| PANSS-DIS | 0.021 | -0.147 | 0.173 | -0.342* | 0.159 | 0.083 | -0.004 | 0.047 | -0.136 | 0.002 | -0.053 | 0.102 |
| PANSS-EXC | 0.156 | 0.012 | 0.086 | 0.020 | 0.266 | 0.131 | -0.039 | -0.106 | -0.093 | 0.023 | -0.072 | -0.044 |
| PANSS-DEP | 0.033 | -0.062 | 0.104 | 0.379* | 0.017 | -0.204 | 0.235 | 0.171 | 0.171 | 0.206 | 0.191 | 0.132 |
| CDSS | -0.176 | -0.034 | -0.218 | 0.117 | -0.095 | -0.287 | 0.521** | 0.296* | 0.503** | 0.453** | 0.324* | 0.409** |
| PSP | 0.004 | 0.130 | 0.009 | -0.117 | -0.064 | 0.053 | -0.305* | -0.271* | -0.255* | -0.223 | -0.179 | -0.223 |

Data are Spearman correlation coefficients (r). * P value<0.05; ** P value<0.01

Abbreviations: ROP= Recent-onset psychosis; SCZ= Schizophrenia; CBQ= Cognitive Biases Questionnaire for Psychosis; CBQ-I=CBQ intentionalizing subscore; CBQ-C= CBQ catastrophizing subscore; CBQ-DT=CBQ dichotomous thinking subscore; CBQ-JTC=CBQ jumping to conclusions subscore; CBQ-ER=CBQ emotional reasoning subscore; PANSS= Positive and Negative Syndrome Scale; PANSS-POS= PANSS positive factor; PANSS-NEG= PANSS negative factor; PANSS-DIS= PANSS disorganized factor; PANSS-EXC= PANNS excited factor; PANSS-DEP= PASS depressive factor; CDSS= Calgary Depression Scale for Schizophrenia; PSP= Personal and Social Performance scale.
